# Supplementary material for: Fully organic ITO replacement through acid doping of double-walled carbon nanotube thin film assemblies
Source: Royal Society of Chemistry journal article supplement (doi:10.1039/c1ra00225b), 2011-01-01
Supplement: c1ra00225b.pdf [file c1ra00225b.pdf]

Supporting Information

DOI: 10.1039/b000000x

## Fully Organic ITO Replacement through Acid Doping of Double-Walled Carbon Nanotube Thin Film Assemblies

Yong Tae Park<sup>a</sup>, Aaron Y. Ham<sup>a</sup>, You-Hao Yang<sup>b</sup> and Jaime C. Grunlan<sup>\*a,b</sup>

<sup>a</sup>Department of Mechanical Engineering

<sup>b</sup>Department of Chemical Engineering

Texas A&M University

3123 TAMU, College Station, TX, 77840 (USA)

E-mail: [jgrunlan@tamu.edu](mailto:jgrunlan@tamu.edu)

\*To whom correspondence should be addressed, Tel: +1 979 845 3027. Fax: +1 979 862 3989. E-mail:  
[jgrunlan@tamu.edu](mailto:jgrunlan@tamu.edu).

## CNT Dispersion.

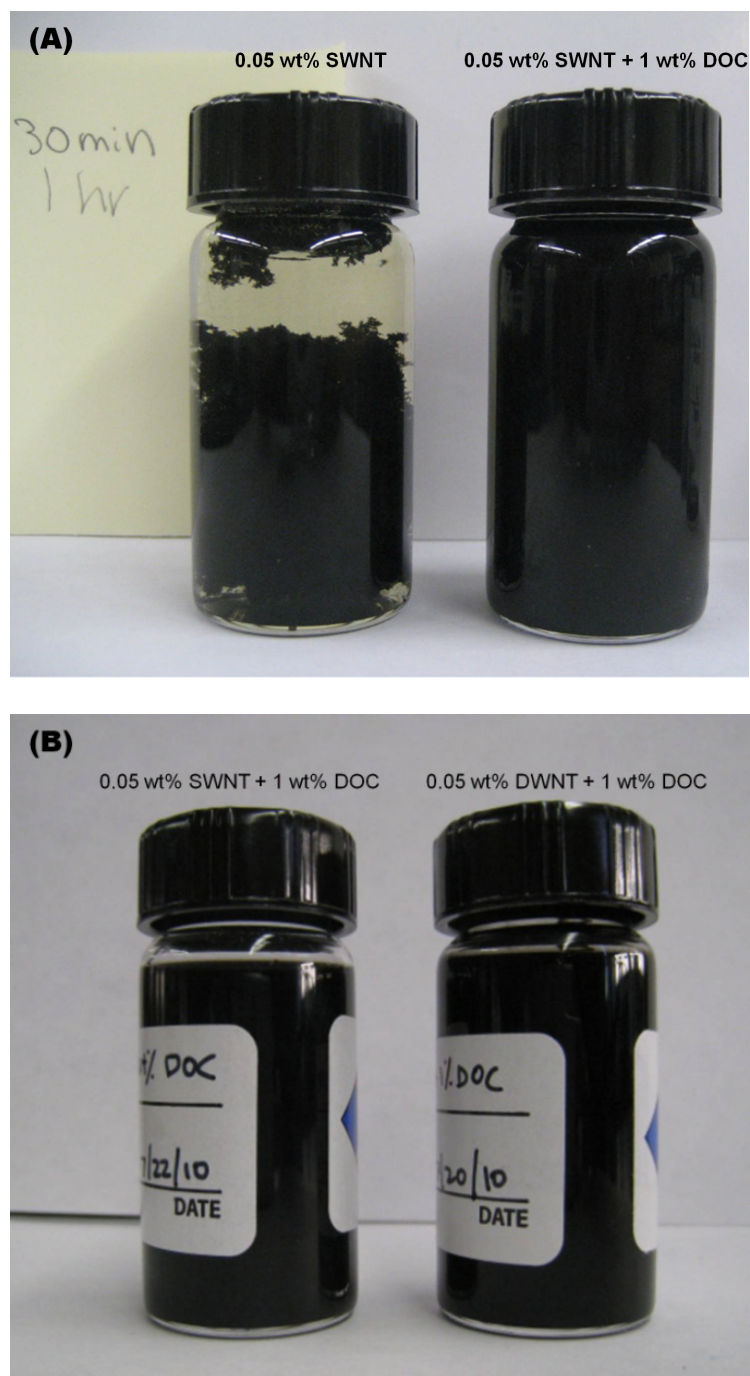

**Fig. S1** (A) Photograph of 0.05 wt% SWNT only solution and (0.05 wt% SWNT+1 wt% DOC) solution after 1 hour sonication. (B) Photograph of (0.05 wt% SWNT+1 wt% DOC) and (0.05 wt% DWNT+1 wt% DOC) solutions 2 months after sonication.

## Optical Images and UV-vis Analysis.

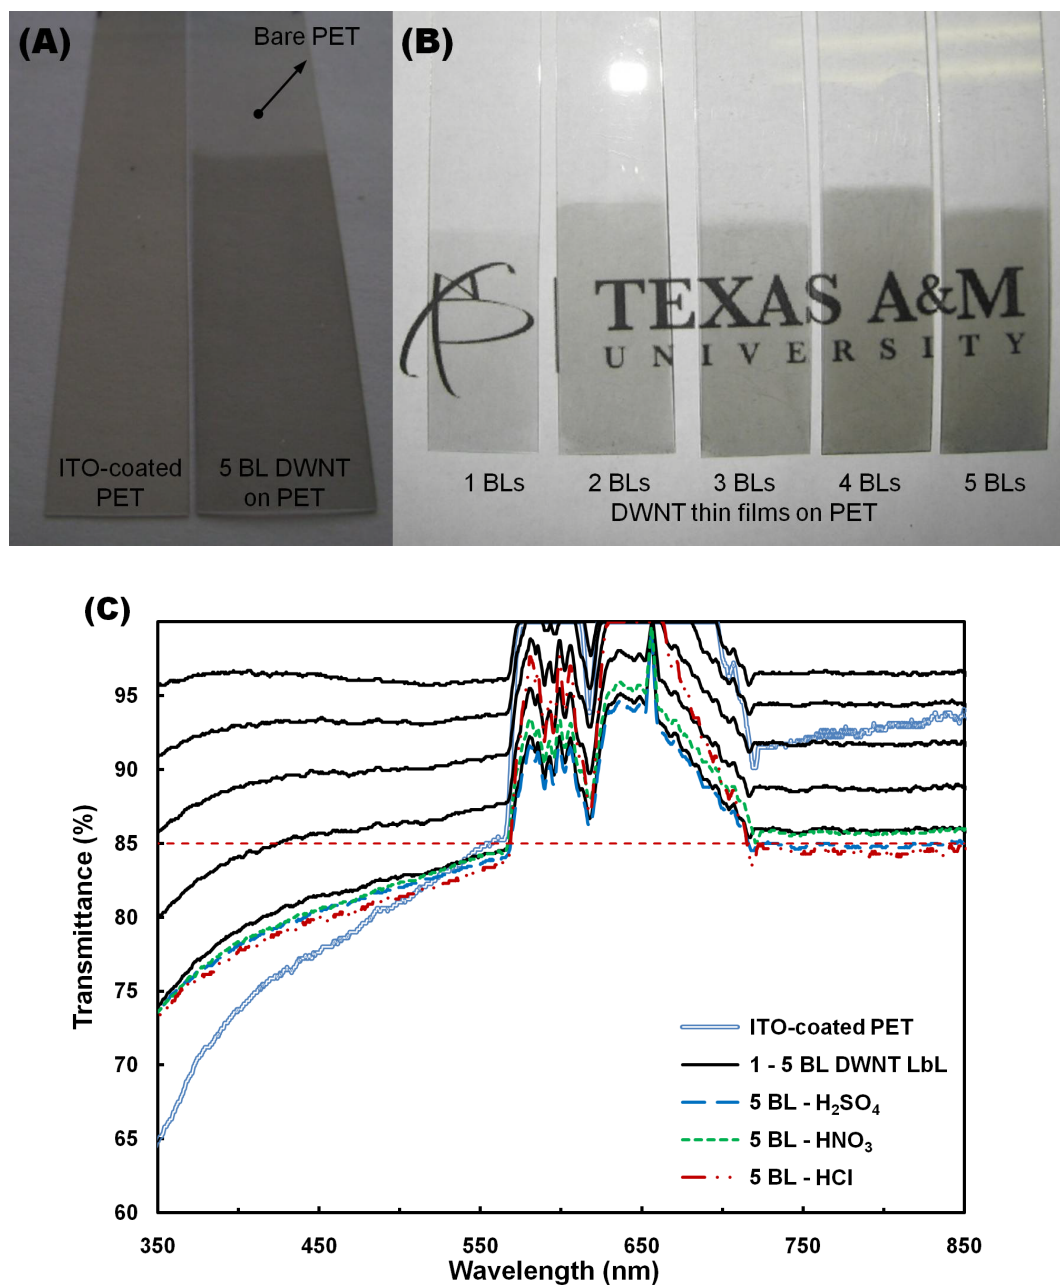

**Fig. S2** (A) Photograph of a  $100 \Omega \text{ sq}^{-1}$  single side ITO-coated PET and a 5 BL DWNT assembly ( $103 \Omega \text{ sq}^{-1}$ ) on both sides of PET. (B) Optical image of  $[\text{PDDA}/(\text{DWNT}+\text{DOC})]_n$  ( $n = 1-5$ ) assemblies on both sides of PET substrates. (C) Transmittance spectra of an ITO-coated PET and  $[\text{PDDA}/(\text{DWNT}+\text{DOC})]_n$  ( $n = 1-5$ ) on PET. Absorbance of the LbL thin films, coated on both sides of PET was divided by two to produce the data shown here. The dotted lines are transmittance of  $[\text{PDDA}/(\text{DWNT}+\text{DOC})]_5$  after sulfuric, nitric, or hydrochloric acid treatment.



### DWNT LbL Films - SEM Surface Images.

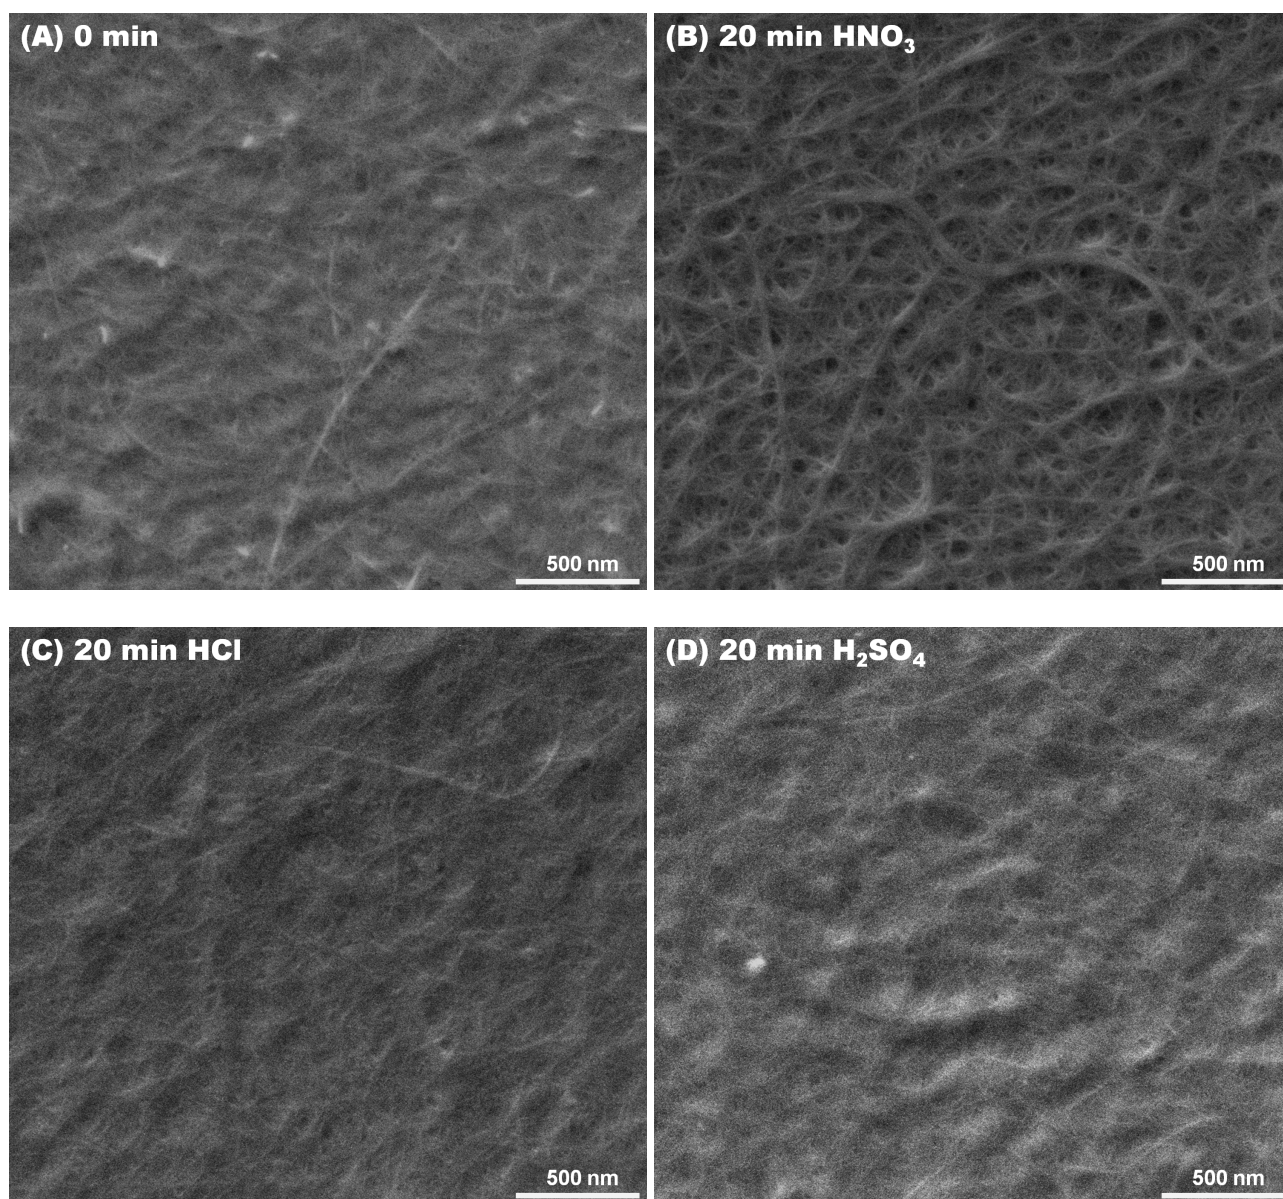

**Fig. S3** SEM surface images of [PDDA/(DWNT+DOC)]<sub>5</sub> on PET (A) before and after (B) 20 min HNO<sub>3</sub>, (C) 20 min HCl, and (D) 20 min H<sub>2</sub>SO<sub>4</sub> treatments.



### Energy Dispersive X-ray (EDX) Spectroscopy.

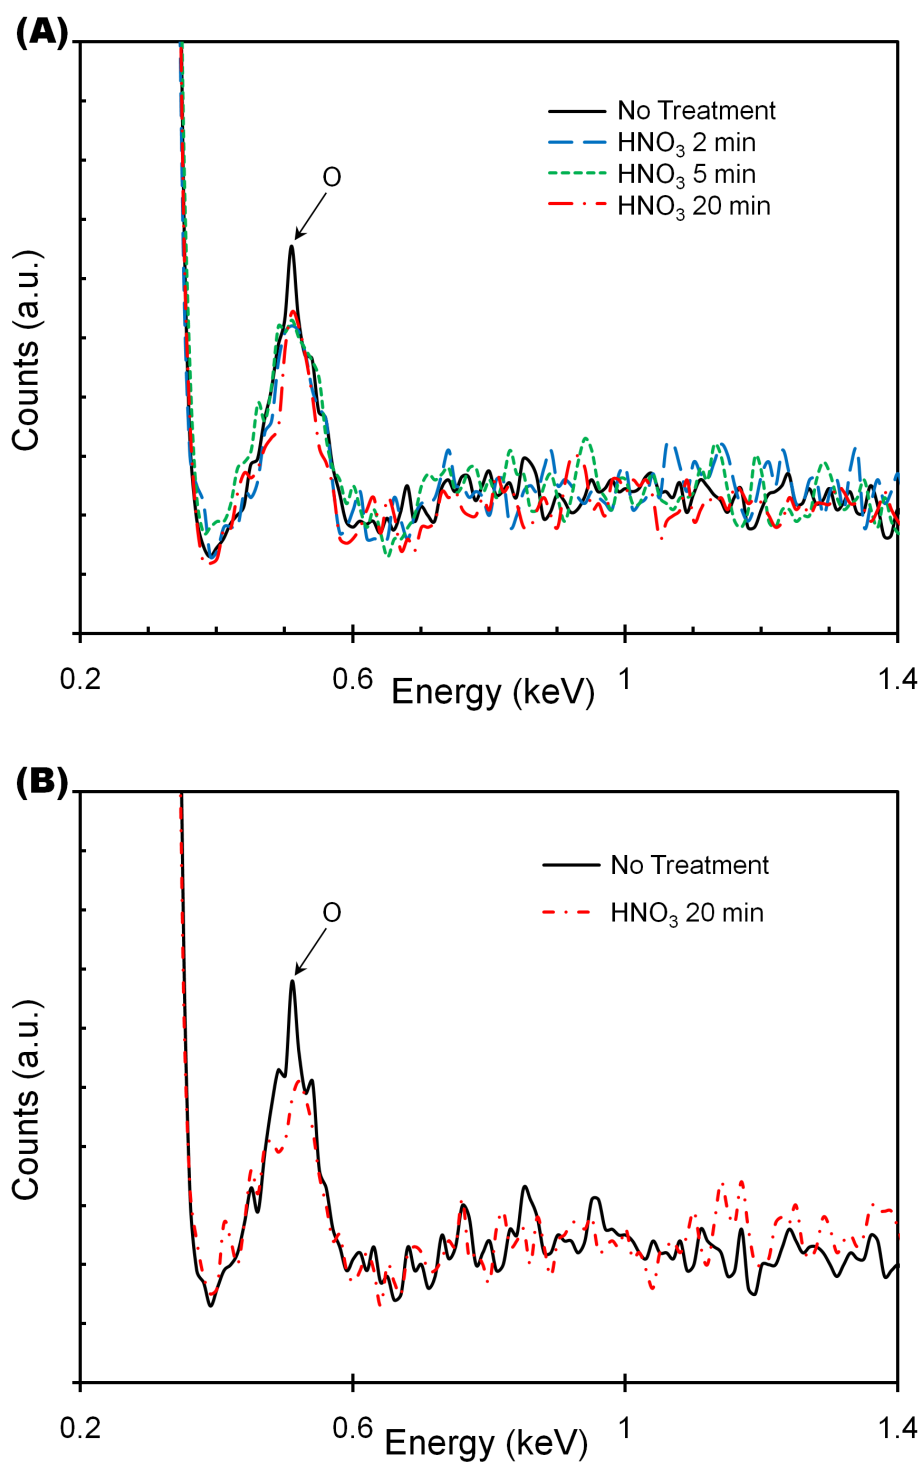

**Fig. S4** (A) EDX spectra of [PDDA/(DWNT+DOC)]<sub>5</sub> before and after 2 to 20 min acid exposure time. (B) EDX spectra of the [PDDA/(SWNT+DOC)]<sub>10</sub> before and after 20 min nitric acid treatment. These spectra are magnified for clarity of oxygen content.

### SEM Surface Images of SWNT LbL Films.

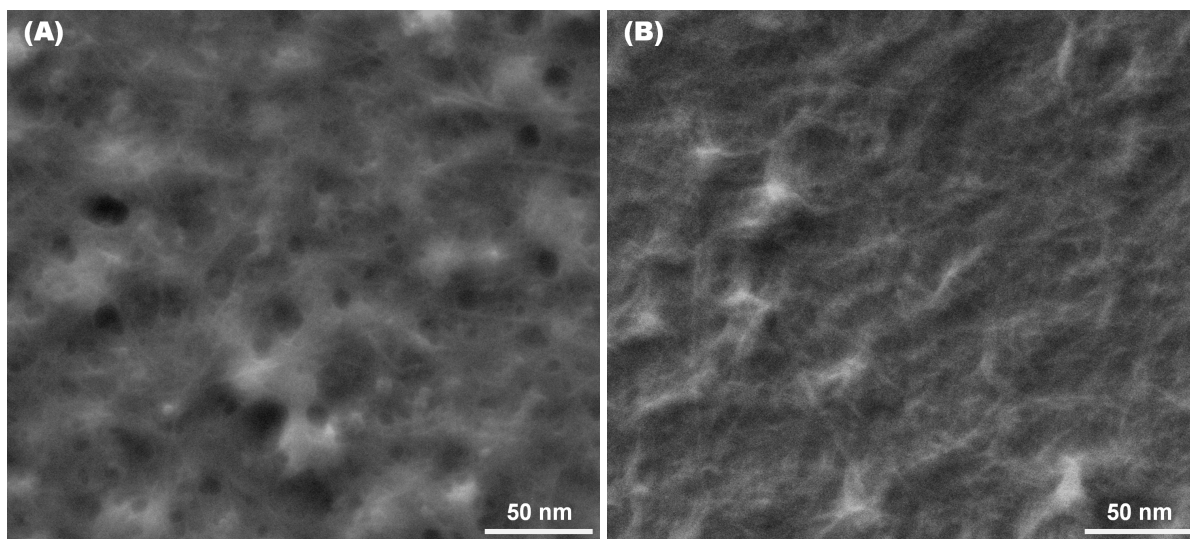

**Fig. S5** SEM surface images of [PDDA/(SWNT+DOC)]<sub>10</sub> on PET (A) before and (B) after 20 min exposure to nitric acid vapor.
